# Supplementary material for: The Effect of Tacrolimus and Mycophenolic Acid on CD14+ Monocyte Activation and Function
Source: PubMed Central journal article supplement (PMC5266297; doi:10.1371/journal.pone.0170806), 2017-01-25
Supplement: pone.0170806.s002.pdf [file pone.0170806.s002.pdf]

**S2 Table. Overview of the effects of tacrolimus and MPA on monocyte activation and function**

|                            | <b>Tacrolimus</b> | <b>MPA</b> | <b>Comments</b>                                             |
|----------------------------|-------------------|------------|-------------------------------------------------------------|
| <b>Signaling pathways</b>  | +                 | +          | Maximum of 30%                                              |
| <b>Cytokine production</b> | -                 | +          | 50% inhibition by MPA                                       |
| <b>Phagocytosis</b>        | -                 | -          |                                                             |
| <b>Differentiation</b>     | +/-               | +/-        | Change in M2 expression markers, but not all subset markers |

**+) effect; +/-) small effect; -) no effect**
